# Supplementary material for: Near infrared laser-heated electrospinning and mechanical properties of poly(ethylene terephthalate)/multi-walled carbon nanotube nanofibers
Source: Royal Society of Chemistry journal article supplement (doi:10.1039/c5ra14276h), 2015-01-01
Supplement: c5ra14276h1.pdf [file c5ra14276h1.pdf]

## Supporting Information

### **Near infrared laser–heated electrospinning and mechanical properties of poly(ethylene terephthalate)/multi-walled carbon nanotube nanofibers**

**Eui Rang Lee and Jae Whan Cho\***

*Department of Organic and Nano System Engineering, Konkuk University, Seoul 143-701,  
Republic of Korea*

The solubility test was carried out for PET/MWNT solutions at different concentrations of PET/MWNT (0.5 wt% MWNT) in TFA as a solvent. The well dispersed state of PET/MWNT solution at 0.001 and 0.002 wt% concentrations was well kept even after 4 hr (Figure S1a-b), indicating a good dispersion of MWNTs. We also measured UV/Vis spectra of the PET/MWNT solutions at different PET/MWNT concentrations of 0.001 – 0.004 wt%, using UV/Vis spectrophotometer (Agilent Technology, G1103A) at room temperature. Figure S1c shows a good linear relation between absorbance and concentration of PET/MWNT solution, indicating a good MWNT dispersion in polymer matrix.

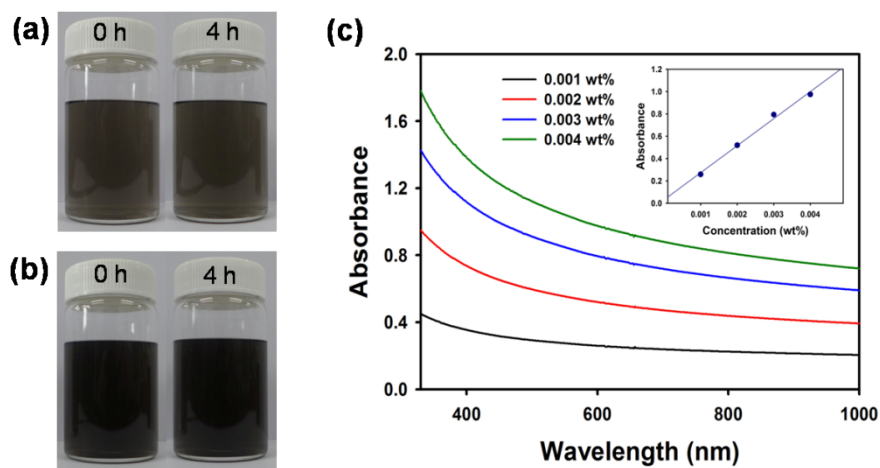

**Figure S1.** (a, b) The solubility test measured at 0 and 4 h after sonication of the polymer composite solutions at different PET/MWNT concentrations: (a) 0.001 wt% and (b) 0.002 wt%. (c) The UV/Vis spectra of the polymer composite solutions at different PET/MWNT concentrations of 0.001 – 0.004 wt%. The inset in (c) indicates a linear relation between absorbance and PET/MWNT concentration in the polymer composite solution.

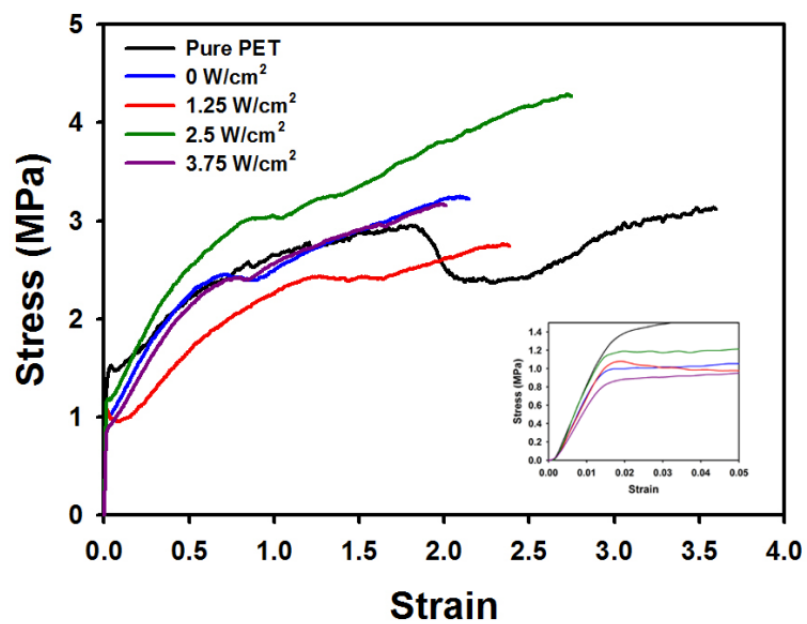

**Figure S2.** Stress–strain curves of the pure PET and PET/MWNT nanofiber webs without laser heating and laser-heated electrospun PET/MWNT nanofiber webs.

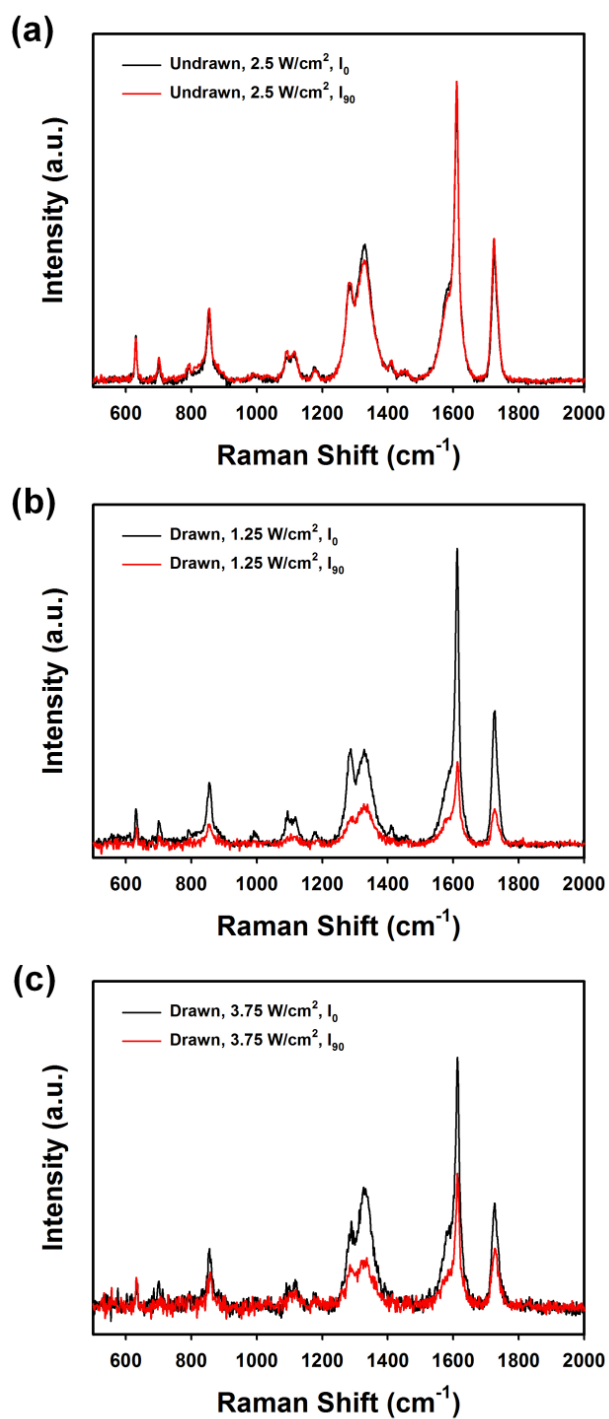

**Figure S3.** Polarized Raman spectra of (a) undrawn PET/MWNT nanofiber webs that were laser-heated at  $2.5 \text{ W/cm}^2$  and drawn PET/MWNT nanofiber webs that were laser-heated at (b)  $1.25$  and (c)  $3.75 \text{ W/cm}^2$ .
